# Supplementary material
Source: publisher site journal article supplement (https://www.dovepress.com/article/336828)
Supplement: Supplementary file 1 [file 336828-additional-file-2.pdf › 336828-additional-file-2.pdf]

Additional file 2:Breakdown of the four categories (clinical, management, education, research)

Q14: Job description

| Category   | Questionnaire           |                             |                              |
|------------|-------------------------|-----------------------------|------------------------------|
| Clinical   | Clinical                | education (self)            |                              |
| Research   | Research                |                             |                              |
| Education  | Education (residents)   | Education (attending staff) | Education (students)         |
| Management | Inter-professional work | Hospital management         | Activity out of the hospital |

Q15: Requisite skill

| Category   | Questionnaire             |                                                                |                             |                    |                    |                                      |                                    |
|------------|---------------------------|----------------------------------------------------------------|-----------------------------|--------------------|--------------------|--------------------------------------|------------------------------------|
| Clinical   | Self-learning ability     | Diagnostic capability                                          | Gaining expertise           | Procedural ability | Patient management | Ability to communicate with patients | Ability to manage a common disease |
| Research   | Student teaching ability  | Ability to train junior staff                                  | Resident education capacity |                    |                    |                                      |                                    |
| Education  | Basic research capability | Clinical research capability                                   |                             |                    |                    |                                      |                                    |
| Management | Hospital management       | Ability to communicate with other doctors in other departments | Patient safety              |                    |                    |                                      |                                    |
